# Supplementary material
Source: HighWire-hosted journal article supplement (https://www.cmaj.ca/content/suppl/2016/01/18/cmaj.150544)
Supplement: 150544-res-1-at.pdf [file 150544-res-1-at.pdf]

**Appendix 1 (as supplied by the authors):** Regression analysis with different groupings of floor of patient contact. CI = confidence interval, CPR = cardiopulmonary resuscitation, OR = odds ratio, SD = standard deviation.

| Regression analysis with floor of patient contact categorized by every 5 floors |             |                |                        |                       |
|---------------------------------------------------------------------------------|-------------|----------------|------------------------|-----------------------|
| Variable                                                                        | Survivors   | Non-Survivors  | Unadjusted Analysis    | Adjusted Analysis     |
|                                                                                 | n = 300     | n = 7,538      | OR (95% CI)            | OR (95% CI)           |
| <b>Age (year), mean (SD)</b>                                                    | 60.1 (16.3) | 71.1 (15.7)    | 0.96<br>(0.958,0.97)   | 0.96<br>(0.96,0.97)   |
| <b>Sex, male, n (%)</b>                                                         | 201 (67.0)  | 4647<br>(61.6) | 0.77<br>(0.61,0.98)    | 0.72<br>(0.54,0.95)   |
| <b>Event witnessed by bystander, n (%)</b>                                      | 224 (74.6)  | 3007<br>(39.9) | 4.76<br>(3.68,6.25)    | 2.94<br>(2.18,4.01)   |
| <b>Floor of contact (≥5 floors), n (%)</b>                                      | 18 (6)      | 575 (7.6)      | 0.74<br>(0.44,1.17)    | 0.77<br>(0.43,1.30)   |
| <b>Floor of contact (≥10 floors), n (%)</b>                                     | 10 (3.3)    | 523 (6.9)      | 0.45<br>(0.22,0.81)    | 0.53<br>(0.26,0.99)   |
| <b>Bystander performed CPR, n (%)</b>                                           | 136 (45.3)  | 2637<br>(35.0) | 1.55<br>(1.23,1.94)    | 1.07<br>(0.82,1.38)   |
| <b>911 response (min), mean (SD)</b>                                            | 5.8 (2.1)   | 6.2 (2.3)      | 0.89<br>(0.83,0.95)    | 0.86<br>(0.80,0.92)   |
| <b>Initial shockable rhythm present, n (%)</b>                                  | 219 (73.0)  | 1160<br>(15.4) | 14.65<br>(11.39,19.02) | 10.75<br>(8.07,14.46) |

Regression analysis with floor of patient contact categorized by every 10 floors

| <b>Variable</b>                                | <b>Survivors</b> | <b>Non-Survivors</b> | <b>Unadjusted Analysis</b> | <b>Adjusted Analysis</b> |
|------------------------------------------------|------------------|----------------------|----------------------------|--------------------------|
|                                                | n = 300          | n = 7538             | OR (95% CI)                | OR (95% CI)              |
| <b>Age (year), mean (SD)</b>                   | 60.1 (16.3)      | 71.1 (15.7)          | 0.96<br>(0.958,0.97)       | 0.96<br>(0.95,0.97)      |
| <b>Sex, male, n (%)</b>                        | 201 (67.0)       | 4647<br>(61.6)       | 0.77<br>(0.61,0.98)        | 0.72<br>(0.54,0.96)      |
| <b>Event witnessed by bystander, n (%)</b>     | 224 (74.6)       | 3007<br>(39.9)       | 4.76<br>(3.68,6.25)        | 2.94<br>(2.18,4.01)      |
| <b>Floor of contact (10–19 floors), n (%)</b>  | 11 (3.7)         | 503 (6.7)            | 0.53<br>(0.27,0.92)        | 0.58<br>(0.29,1.06)      |
| <b>Floor of contact (≥20 floors), n (%)</b>    | 2 (0.67)         | 116 (1.5)            | 0.42<br>(0.07,1.32)        | 0.53<br>(0.08,1.87)      |
| <b>Bystander performed CPR, n (%)</b>          | 136 (45.3)       | 2637<br>(35.0)       | 1.55<br>(1.23,1.94)        | 1.07<br>(0.83,1.38)      |
| <b>911 response (min), mean (SD)</b>           | 5.8 (2.1)        | 6.2 (2.3)            | 0.89<br>(0.83,0.95)        | 0.86<br>(0.79,0.92)      |
| <b>Initial shockable rhythm present, n (%)</b> | 219 (73.0)       | 1160<br>(15.4)       | 14.65<br>(11.39,19.02)     | 10.78<br>(8.09,14.50)    |

Box and Whisker plot of survivors vs. non-survivors by floor of patient contact

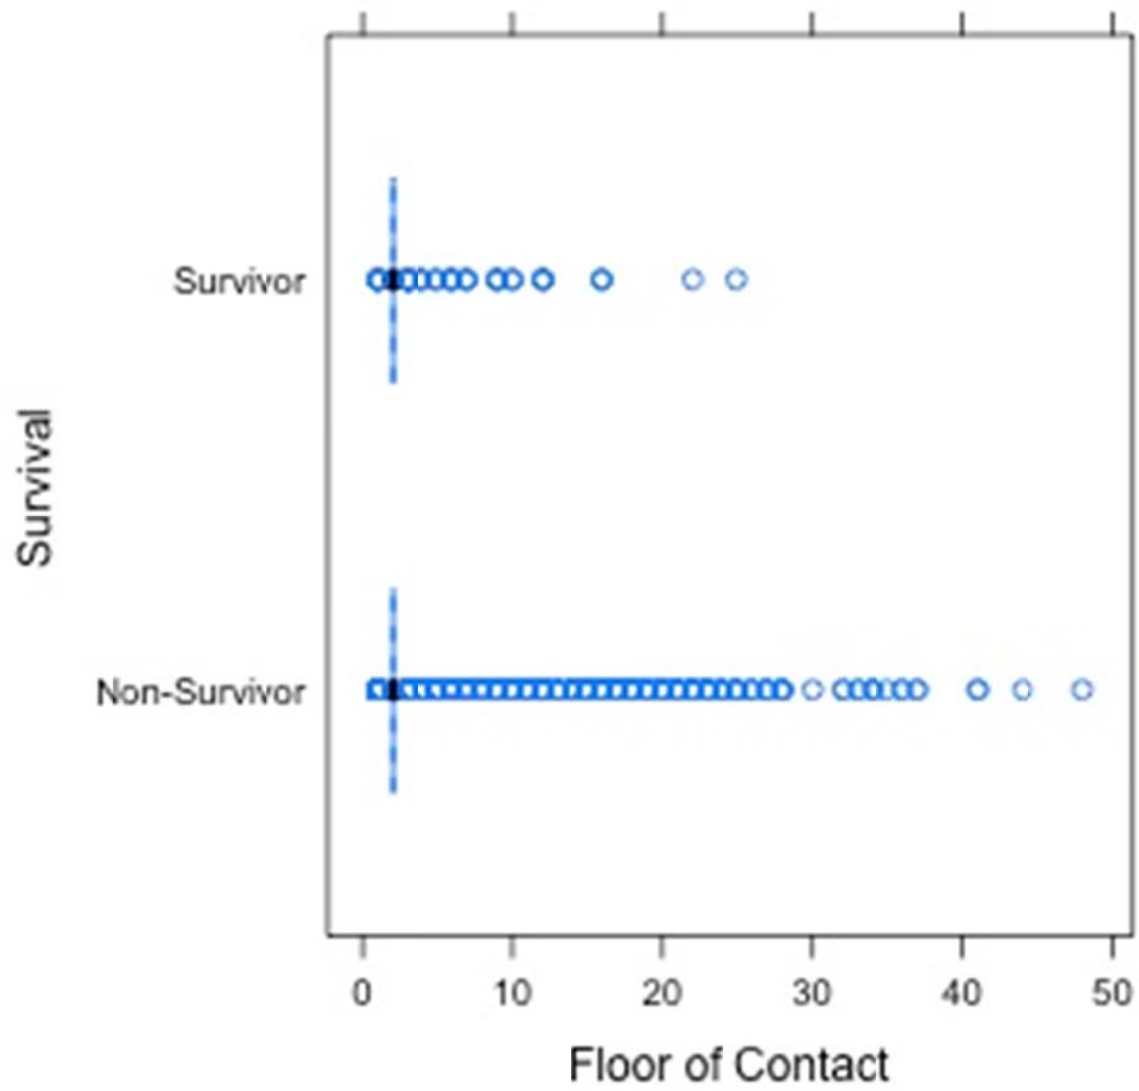

| Regression analysis including the time from 911 responder arrival on scene to patient contact |             |                |                        |                       |
|-----------------------------------------------------------------------------------------------|-------------|----------------|------------------------|-----------------------|
| Variable                                                                                      | Survivors   | Non-Survivors  | Unadjusted Analysis    | Adjusted Analysis     |
|                                                                                               | n = 300     | n = 7538       | OR (95% CI)            | OR (95% CI)           |
| <b>Age (year), mean (SD)</b>                                                                  | 60.1 (16.3) | 71.1 (15.7)    | 0.96<br>(0.958,0.97)   | 0.96<br>(0.96,0.97)   |
| <b>Sex, male, n (%)</b>                                                                       | 201 (67.0)  | 4647<br>(61.6) | 0.77<br>(0.61,0.98)    | 0.72<br>(0.54,0.97)   |
| <b>Event witnessed by bystander, n (%)</b>                                                    | 224 (74.6)  | 3007<br>(39.9) | 4.76<br>(3.68,6.25)    | 2.84<br>(2.09,3.91)   |
| <b>Floor of contact (<math>\geq 3</math> floors), n (%)</b>                                   | 48 (16.0)   | 1795<br>(23.8) | 0.61<br>(0.44,0.83)    | 0.70<br>(0.47,1.02)   |
| <b>Bystander performed CPR, n (%)</b>                                                         | 136 (45.3)  | 2637<br>(35.0) | 1.55<br>(1.23,1.94)    | 1.06<br>(0.81,1.38)   |
| <b>911 response to the scene (min), mean (SD)</b>                                             | 5.8 (2.1)   | 6.2 (2.3)      | 0.89<br>(0.83,0.95)    | 0.86<br>(0.79,0.93)   |
| <b>Initial shockable rhythm present, n (%)</b>                                                | 219 (73.0)  | 1160<br>(15.4) | 14.65<br>(11.39,19.02) | 11.37<br>(8.44,15.48) |
| <b>Time from arrival of 911 responders to patient contact (min), mean (SD)</b>                | 3.2 (1.9)   | 3.5 (2.2)      | 0.94<br>(0.88,0.99)    | 1.00<br>(0.94,1.07)   |
